# Supplementary material for: Chain length dependent alkane/β-cyclodextrin nonamphiphilic supramolecular building blocks
Source: Royal Society of Chemistry journal article supplement (doi:10.1039/c5sm02698a), 2015-11-20
Supplement: c5sm02698a1.pdf [file c5sm02698a1.pdf]

## Chain Length Dependent Alkanes/ $\beta$ -Cyclodextrin

### Nonamphiphilic Supramolecular Building Blocks

Chengcheng Zhou,<sup>1,2</sup> Jianbin Huang,<sup>1\*</sup> Yun Yan<sup>1\*</sup>

<sup>1</sup>Beijing National Laboratory for Molecular Sciences (BNLMS), State Key Laboratory for Structural Chemistry of Unstable and Stable Species, College of Chemistry and Molecular Engineering, Peking University, Beijing 100871, P. R. China.

<sup>2</sup>Institute of Chemistry, Chinese Academy of Sciences, Beijing, China  
E-mail: yunyan@pku.edu.cn; jbhuan@pku.edu.cn

### Supporting Information

#### 1. <sup>1</sup>H NMR spectra of alkane/ $\beta$ -CD precipitates.

The actual host-guest ratio of  $\beta$ -CD to alkane is calculated based on the integrations of  $\beta$ -CD (H1 protons) and the total integration of alkane protons.

a) pentane/ $\beta$ -CD (H1/7:H<sub>pentane</sub>/12=1.00/7:(1.13+0.33)/12=1.1:1),

b) hexane/ $\beta$ -CD (H1/7:H<sub>hexane</sub>/14=2.86/7:(4.15+0.98)/14=1.1:1),

c) octane/ $\beta$ -CD (H1/7:H<sub>octane</sub>/18=1.00/7:(1.72+0.51)/18=1.1:1),

d) decane/ $\beta$ -CD (H1/7:H<sub>decane</sub>/22=1.00/7:(1.90+0.54)/22=1.2:1),

e) tetradecane/ $\beta$ -CD (H1/7:H<sub>tetradecane</sub>/30=1.00/7:(2.06+0.49)/30=1.7:1),

f) hexadecane/ $\beta$ -CD (H1/7:H<sub>hexadecane</sub>/34=1.00/7:(3.04+0.60)/34=1.3:1),

g) octadecane/ $\beta$ -CD (H1/7:H<sub>octadecane</sub>/38=3.01/7:(11.68+2.72)/38=1.1:1).

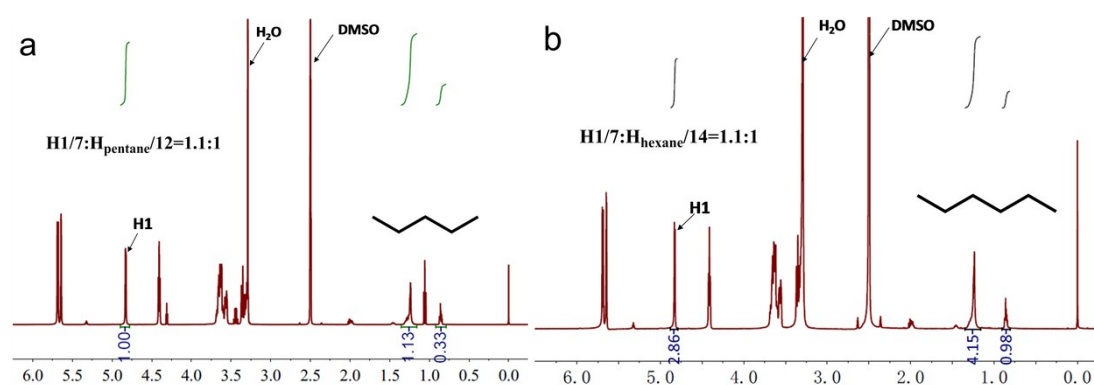

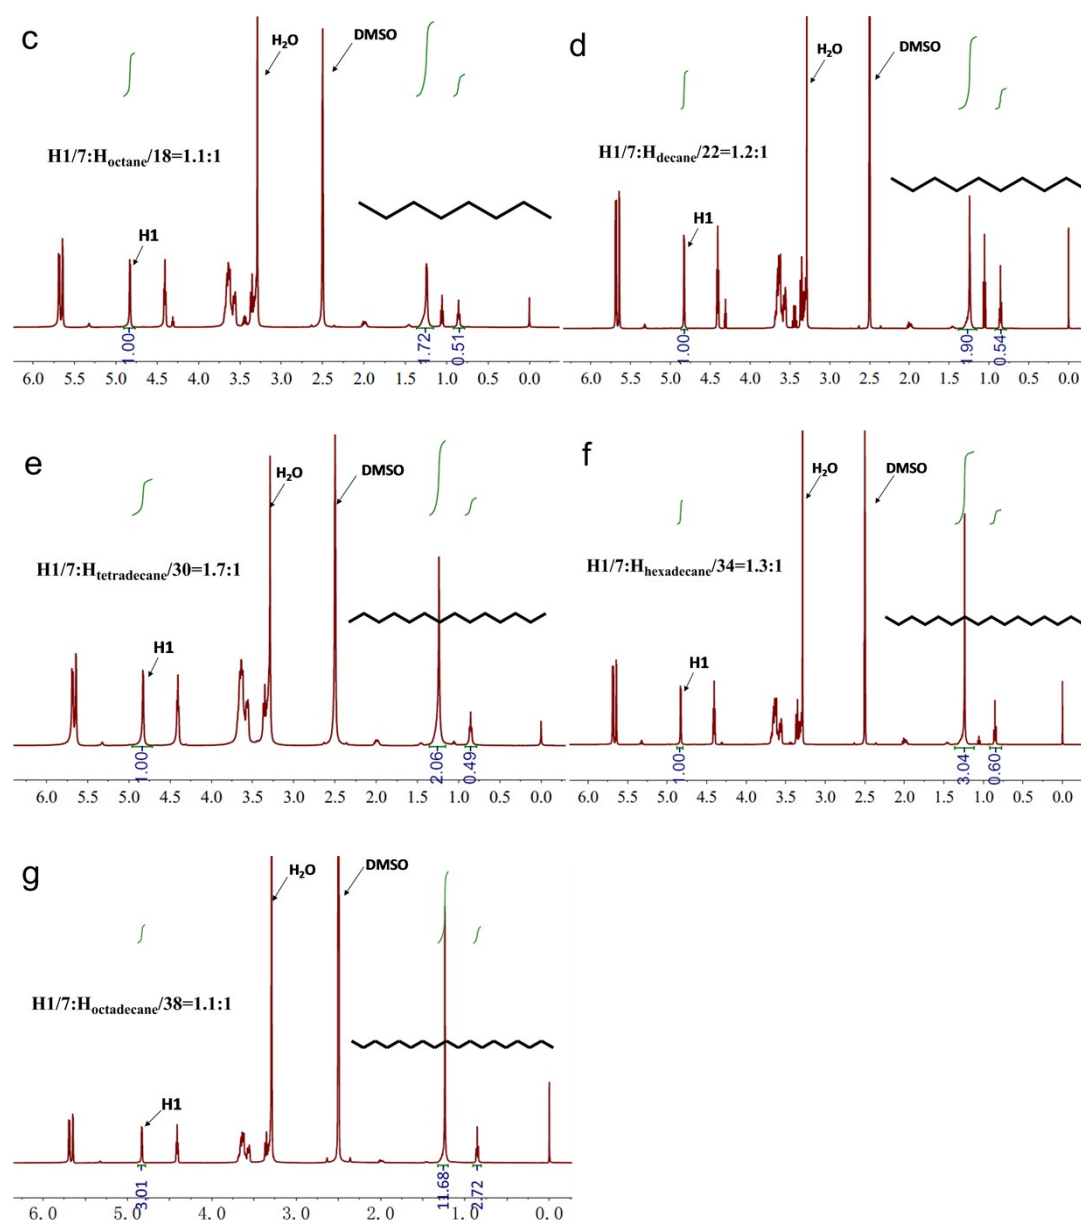

**Figure S1** a)-g) <sup>1</sup>H NMR spectra with assignments and integration of alkane/β-CD precipitates dissolved in DMSO-d<sub>6</sub> (alkane: pentane, hexane, octane, decane, tetradecane, hexadecane and octadecane, respectively).

## 2. ESI-MS spectra of alkane/β-CD sample.

ESI-MS measurement of hexane/β-CD vesicle sample showed the presence of  $[2\text{hexane}@2\beta\text{-CD}-5\text{H}_2\text{O}+3\text{H}]^{3+}$  ( $m/z = 784.89421$ , the theoretical value  $m/z=784.97754$ ) (Figure S2a). In Figure S2b, octadecane/β-CD vesicle showed the presence of  $[2(2\text{octadecane}@2\beta\text{-CD})-6\text{H}_2\text{O}+2\text{Na}]^{2+}$  ( $m/z = 2747.26566$ , the theoretical value  $m/z=2747.29566$ , error: -10 ppm). The larger error in our case may be attributed to that the large molecular mass for  $2\text{alkane}@2\beta\text{-CD}$  exceeds the upper

limit of 2000 for the HR-ESI-MS.

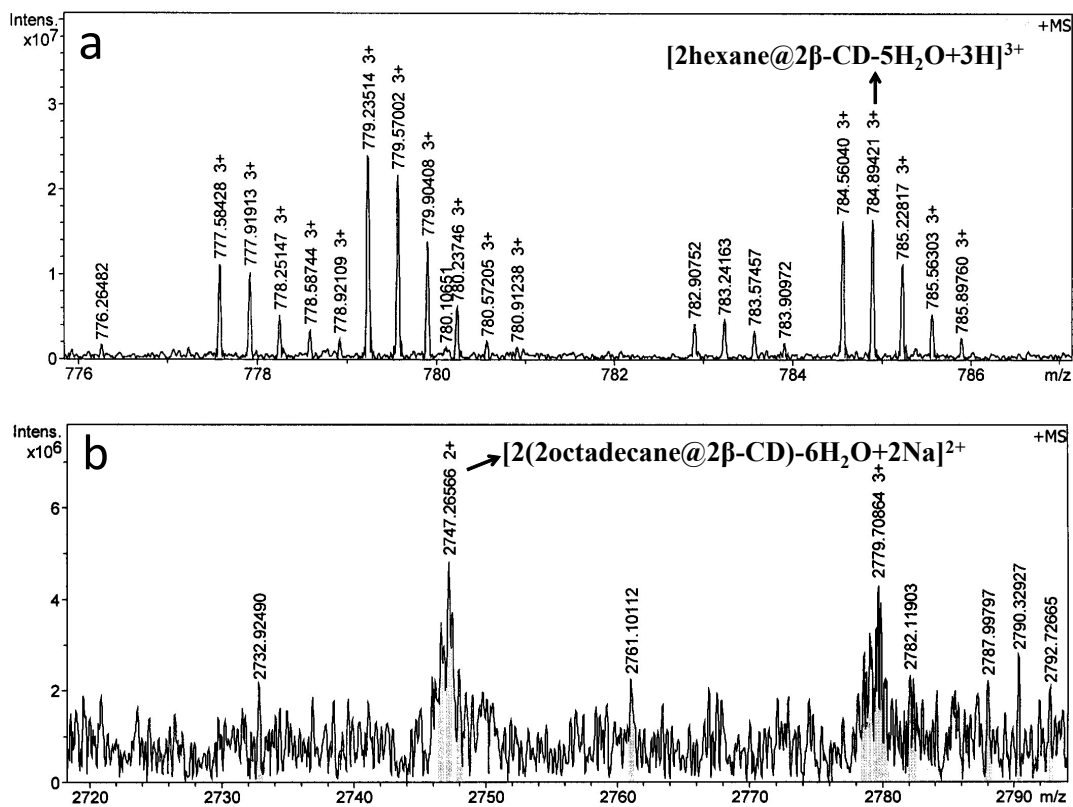

**Figure S2** ESI-MS results of a) hexane/ $\beta$ -CD sample and b) octadecane/ $\beta$ -CD sample in positive mode.

### 3. Addition of urea into the hexane/ $\beta$ -CD sample.

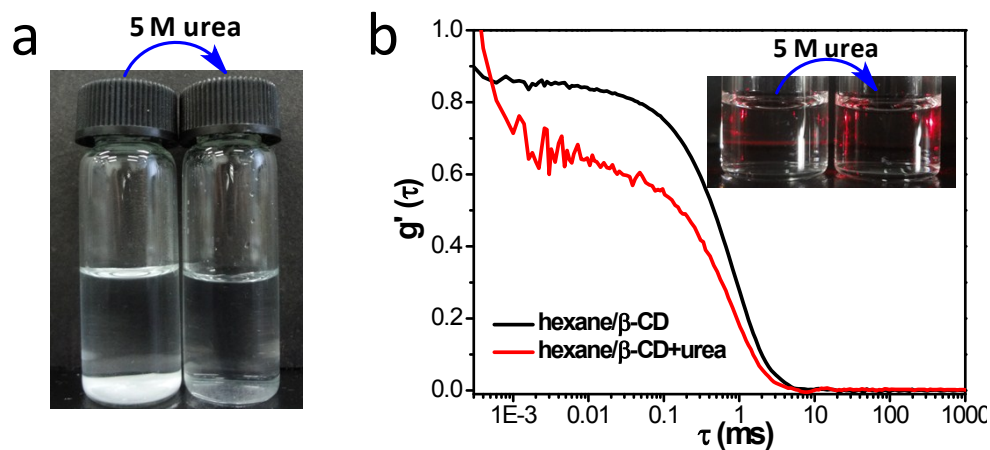

**Figure S3** a) The macrographs of hexane/ $\beta$ -CD sample ( $C_{\beta\text{-CD}}=16$  mM) and b) normalized intensity correlation function of hexane/ $\beta$ -CD vesicles sample with the macrographs of the scattering intensity (inset) before and after the addition of 5 M urea.
